# Supplementary material for: Tetraspanin-2 promotes glucotoxic apoptosis by regulating the JNK/β-catenin signaling pathway in human pancreatic β cells
Source: PubMed Central journal article supplement — FASEB J. 2016 May 31;30(9):3107–16. doi: 10.1096/fj.201600240RR (PMC5001516; doi:10.1096/fj.201600240rr), 2016-05-31
Supplement: supp_fj.201600240RR_Supplemental_Table1.pdf [file supp_fj.201600240RR_Supplemental_Table1.pdf]

Supplementary Table 1. The signaling genes related to apoptosis and cell death changed between NG and HG-treated human pancreatic  $\beta$  cells.

| Gene Symbol | Ratio (HG/NG) | P-value | HG(signal intensity) | NG(signal intensity) | Gene Name                                                                                                 |
|-------------|---------------|---------|----------------------|----------------------|-----------------------------------------------------------------------------------------------------------|
| PRKCE       | 15.77         | 0.1554  | 2019                 | 38                   | protein kinase C, epsilon                                                                                 |
| NOTCH1      | 5.49          | 0.1380  | 87                   | 11                   | Notch homolog 1, translocation-associated (Drosophila)                                                    |
| HMGB2       | 4.05          | 0.2505  | 62                   | 7                    | high-mobility group box 2                                                                                 |
| MAPKAPK5    | 3.59          | 0.0933  | 51                   | 12                   | mitogen-activated protein kinase-activated protein kinase 5                                               |
| TM7SF3      | 3.37          | 0.4270  | 114                  | 8                    | transmembrane 7 superfamily member 3                                                                      |
| PPARG       | 3.30          | 0.0077  | 50                   | 15                   | peroxisome proliferator-activated receptor gamma                                                          |
| BIRC3       | 3.23          | 0.4499  | 125                  | 9                    | baculoviral IAP repeat-containing 3                                                                       |
| PTK2        | 3.21          | 0.2739  | 47                   | 8                    | PTK2 protein tyrosine kinase 2                                                                            |
| TFAM        | 2.98          | 0.0007  | 41                   | 14                   | transcription factor A, mitochondrial                                                                     |
| SP1         | 2.95          | 0.1696  | 49                   | 13                   | Sp1 transcription factor                                                                                  |
| TRPV1       | 2.93          | 0.0043  | 21                   | 7                    | transient receptor potential cation channel, subfamily V, member 1                                        |
| PTPN11      | 2.90          | 0.3883  | 67                   | 9                    | protein tyrosine phosphatase, non-receptor type 11                                                        |
| PDE4A       | 2.87          | 0.3747  | 56                   | 8                    | phosphodiesterase 4A, cAMP-specific (phosphodiesterase E2 dunce homolog, Drosophila)                      |
| HIP1        | 2.85          | 0.0099  | 40                   | 14                   | huntingtin interacting protein 1                                                                          |
| CLSPN       | 2.74          | 0.3910  | 54                   | 8                    | claspin homolog (Xenopus laevis)                                                                          |
| HTR2A       | 2.72          | 0.0284  | 23                   | 8                    | 5-hydroxytryptamine (serotonin) receptor 2A                                                               |
| GRIN3A      | 2.71          | 0.3778  | 52                   | 9                    | glutamate receptor, ionotropic, N-methyl-D-aspartate 3A                                                   |
| TRAF6       | 2.64          | 0.1616  | 21                   | 7                    | TNF receptor associated factor 6                                                                          |
| IFT57       | 2.62          | 0.0746  | 29                   | 10                   | intraflagellar transport 57 homolog (Chlamydomonas)                                                       |
| ABL1        | 2.59          | 0.0524  | 65                   | 24                   | c-abl oncogene 1, receptor tyrosine kinase                                                                |
| TJP2        | 2.57          | 0.2809  | 32                   | 8                    | tight junction protein 2 (zona occludens 2)                                                               |
| DSG1        | 2.56          | 0.3706  | 37                   | 7                    | desmoglein 1                                                                                              |
| TRIM13      | 2.48          | 0.0429  | 27                   | 10                   | tripartite motif-containing 13                                                                            |
| PPARD       | 2.44          | 0.0233  | 2938                 | 1184                 | peroxisome proliferator-activated receptor delta                                                          |
| PARP1       | 2.41          | 0.4346  | 71                   | 13                   | poly (ADP-ribose) polymerase 1                                                                            |
| MSH2        | 2.39          | 0.4547  | 64                   | 11                   | mutS homolog 2, colon cancer, nonpolyposis type 1 (E. coli)                                               |
| TLR3        | 2.35          | 0.2158  | 49                   | 17                   | toll-like receptor 3                                                                                      |
| FNTA        | 2.35          | 0.0572  | 36                   | 15                   | farnesyltransferase, CAAX box, alpha                                                                      |
| ID1         | 2.26          | 0.0013  | 382                  | 169                  | inhibitor of DNA binding 1, dominant negative helix-loop-helix protein                                    |
| IL12A       | 2.22          | 0.1879  | 20                   | 8                    | interleukin 12A (natural killer cell stimulatory factor 1, cytotoxic lymphocyte maturation factor 1, p35) |
| NCL         | 2.17          | 0.4047  | 27                   | 7                    | nucleolin                                                                                                 |
| NFKB1       | 2.17          | 0.4614  | 50                   | 11                   | nuclear factor of kappa light polypeptide gene enhancer in B-cells 1                                      |
| PDCD6IP     | 2.17          | 0.1758  | 28                   | 11                   | programmed cell death 6 interacting protein                                                               |
| UBC         | 2.15          | 0.0072  | 47104                | 21792                | ubiquitin C                                                                                               |
| MECOM       | 2.14          | 0.0753  | 19                   | 8                    | MDS1 and EVI1 complex locus                                                                               |
| ITGB2       | 2.14          | 0.3708  | 32                   | 9                    | integrin, beta 2 (complement component 3 receptor 3 and 4 subunit)                                        |
| PARP4       | 2.13          | 0.0433  | 53                   | 24                   | poly (ADP-ribose) polymerase family, member 4                                                             |
| DNM1L       | 2.13          | 0.1029  | 36                   | 16                   | dynamamin 1-like                                                                                          |
| CDC6        | 2.11          | 0.0215  | 85                   | 40                   | cell division cycle 6 homolog (S. cerevisiae)                                                             |

|          |      |        |      |      |                                                                               |
|----------|------|--------|------|------|-------------------------------------------------------------------------------|
| RFFL     | 2.11 | 0.3981 | 34   | 10   | ring finger and FYVE-like domain containing 1                                 |
| CDKN2A   | 2.11 | 0.0815 | 48   | 22   | cyclin-dependent kinase inhibitor 2A (melanoma, p16, inhibits CDK4)           |
| PTPMT1   | 2.09 | 0.0160 | 48   | 23   | protein tyrosine phosphatase, mitochondrial 1                                 |
| GAS6     | 2.09 | 0.1820 | 36   | 15   | growth arrest-specific 6                                                      |
| CD9      | 2.08 | 0.4452 | 2290 | 1100 | CD9 molecule                                                                  |
| CYCS     | 2.07 | 0.0099 | 91   | 44   | cytochrome c, somatic                                                         |
| CAV1     | 2.05 | 0.0153 | 6055 | 2932 | caveolin 1, caveolae protein, 22kDa                                           |
| FOXL2    | 2.04 | 0.2584 | 102  | 39   | forkhead box L2                                                               |
| WNT11    | 2.02 | 0.0204 | 142  | 70   | wingless-type MMTV integration site family, member 11                         |
| CD81     | 2.01 | 0.0069 | 35   | 17   | CD81 molecule                                                                 |
| TFAP2A   | 2.01 | 0.0051 | 628  | 311  | transcription factor AP-2 alpha (activating enhancer binding protein 2 alpha) |
| AKT2     | 2.01 | 0.0605 | 86   | 42   | v-akt murine thymoma viral oncogene homolog 2                                 |
| ESR2     | 2.00 | 0.4734 | 46   | 12   | estrogen receptor 2 (ER beta)                                                 |
| MAGED1   | 0.50 | 0.1224 | 35   | 66   | melanoma antigen family D, 1                                                  |
| RUNX1    | 0.50 | 0.1217 | 13   | 24   | runt-related transcription factor 1                                           |
| CASP2    | 0.49 | 0.0601 | 43   | 84   | caspase 2, apoptosis-related cysteine peptidase                               |
| BID      | 0.49 | 0.0255 | 149  | 298  | BH3 interacting domain death agonist                                          |
| EIF2AK2  | 0.49 | 0.0031 | 384  | 790  | eukaryotic translation initiation factor 2-alpha kinase 2                     |
| FLCN     | 0.48 | 0.0461 | 16   | 33   | folliculin                                                                    |
| NTRK3    | 0.48 | 0.0049 | 365  | 761  | neurotrophic tyrosine kinase, receptor, type 3                                |
| ESR1     | 0.47 | 0.0021 | 140  | 294  | estrogen receptor 1                                                           |
| APC      | 0.47 | 0.1118 | 31   | 61   | adenomatous polyposis coli                                                    |
| LAPTM4B  | 0.47 | 0.1458 | 13   | 24   | lysosomal protein transmembrane 4 beta                                        |
| MET      | 0.46 | 0.0241 | 221  | 471  | met proto-oncogene (hepatocyte growth factor receptor)                        |
| PLK1     | 0.46 | 0.0514 | 75   | 159  | polo-like kinase 1 (Drosophila)                                               |
| TMEM173  | 0.45 | 0.0089 | 8    | 17   | transmembrane protein 173                                                     |
| TNFSF10  | 0.45 | 0.0500 | 30   | 66   | tumor necrosis factor (ligand) superfamily, member 10                         |
| PARK2    | 0.44 | 0.0554 | 43   | 95   | Parkinson disease (autosomal recessive, juvenile) 2, parkin                   |
| PSIP1    | 0.44 | 0.0443 | 14   | 30   | PC4 and SFRS1 interacting protein 1                                           |
| UBE2N    | 0.43 | 0.0709 | 20   | 44   | ubiquitin-conjugating enzyme E2N (UBC13 homolog, yeast)                       |
| BNIP2    | 0.42 | 0.1076 | 27   | 59   | BCL2/adenovirus E1B 19kDa interacting protein 2                               |
| CYP2E1   | 0.42 | 0.0133 | 9    | 22   | cytochrome P450, family 2, subfamily E, polypeptide 1                         |
| CCL2     | 0.37 | 0.0032 | 15   | 39   | chemokine (C-C motif) ligand 2                                                |
| CDC42    | 0.34 | 0.0781 | 42   | 111  | cell division cycle 42 (GTP binding protein, 25kDa)                           |
| CD99     | 0.34 | 0.0401 | 44   | 124  | CD99 molecule                                                                 |
| DNASE1L3 | 0.32 | 0.0149 | 11   | 32   | deoxyribonuclease I-like 3                                                    |
| CENPE    | 0.31 | 0.0080 | 52   | 165  | centromere protein E, 312kDa                                                  |
| EPOR     | 0.22 | 0.0121 | 27   | 119  | erythropoietin receptor                                                       |
| CCR3     | 0.21 | 0.1553 | 36   | 101  | chemokine (C-C motif) receptor 3                                              |
| QSOX2    | 0.09 | 0.0013 | 9    | 95   | quiescin Q6 sulfhydryl oxidase 2                                              |
