# Supplementary figures and images for: Tetraspanin-2 promotes glucotoxic apoptosis by regulating the JNK/β-catenin signaling pathway in human pancreatic β cells
Source: PubMed Central journal article supplement — FASEB J. 2016 May 31;30(9):3107–16. doi: 10.1096/fj.201600240RR (PMC5001516; doi:10.1096/fj.201600240rr), 2016-05-31

Supplementary Figure 1: Signal network of the genes in response to glucose in RNAKT-15 cells

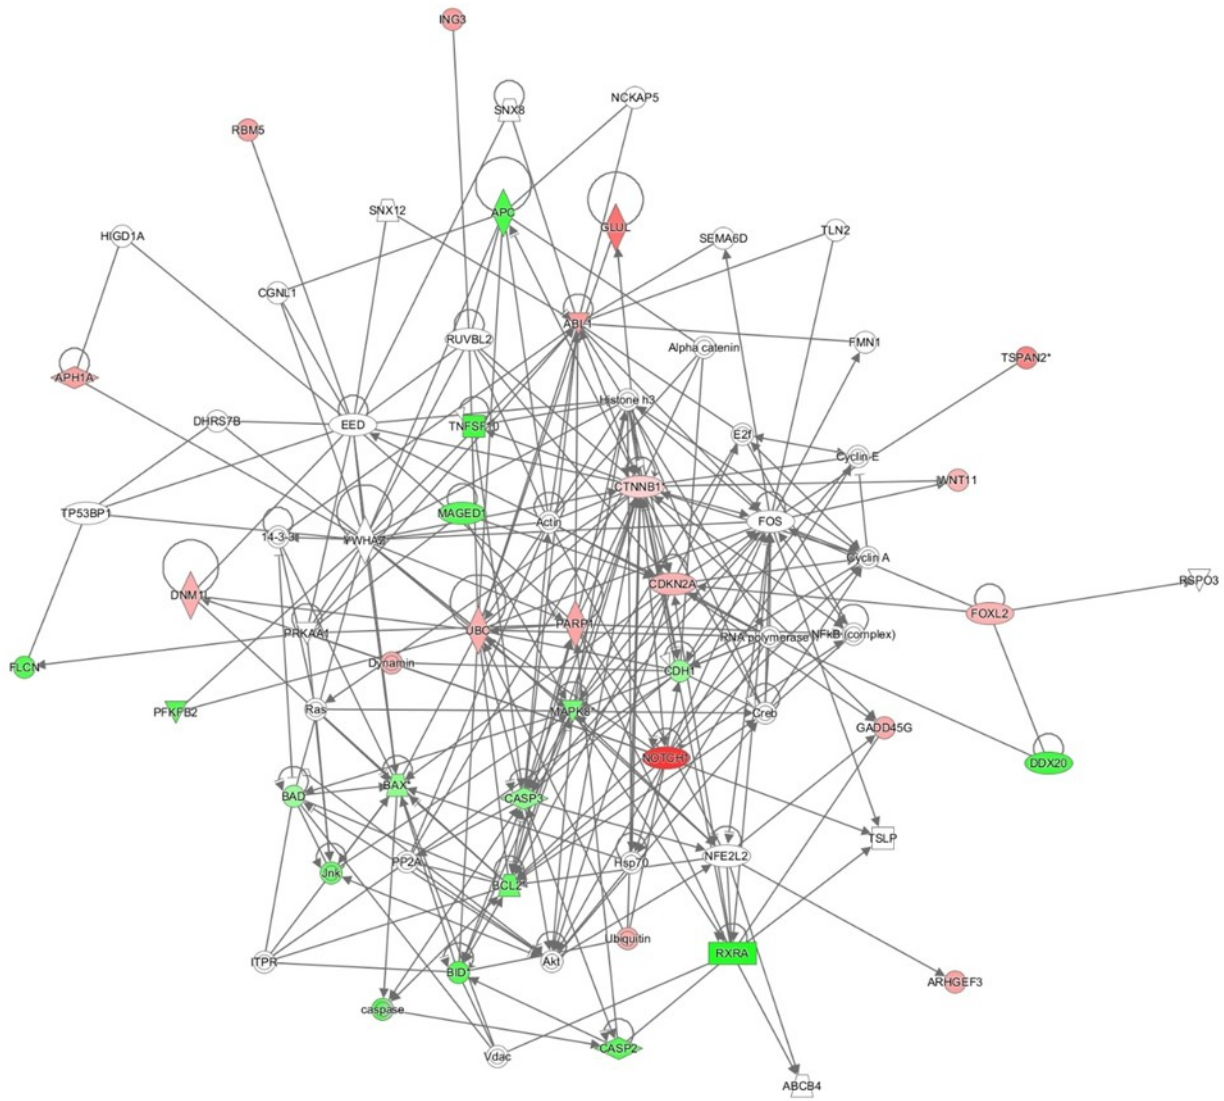

Supplement: supp_fj.201600240RR_Supplemental_Figure1.pdf [file supp_fj.201600240RR_Supplemental_Figure1.pdf]
